# Supplementary material
Source: PubMed Central journal article supplement (PMC8049468)
Supplement: mmc1.pdf [file mmc1.pdf]

**Supplemental information**

**CD8<sup>+</sup> T cells specific for an immunodominant**

**SARS-CoV-2 nucleocapsid epitope display high naive**

**precursor frequency and TCR promiscuity**

**Thi H.O. Nguyen, Louise C. Rowntree, Jan Petersen, Brendon Y. Chua, Luca Hensen, Lukasz Kedzierski, Carolien E. van de Sandt, Priyanka Chaurasia, Hyon-Xhi Tan, Jennifer R. Habel, Wuji Zhang, Lilith F. Allen, Linda Earnest, Kai Yan Mak, Jennifer A. Juno, Kathleen Wragg, Francesca L. Mordant, Fatima Amanat, Florian Krammer, Nicole A. Mifsud, Denise L. Doolan, Katie L. Flanagan, Sabrina Sonda, Jasveen Kaur, Linda M. Wakim, Glen P. Westall, Fiona James, Effie Mouhtouris, Claire L. Gordon, Natasha E. Holmes, Olivia C. Smibert, Jason A. Trubiano, Allen C. Cheng, Peter Harcourt, Patrick Clifton, Jeremy Chase Crawford, Paul G. Thomas, Adam K. Wheatley, Stephen J. Kent, Jamie Rossjohn, Joseph Torresi, and Katherine Kedzierska**

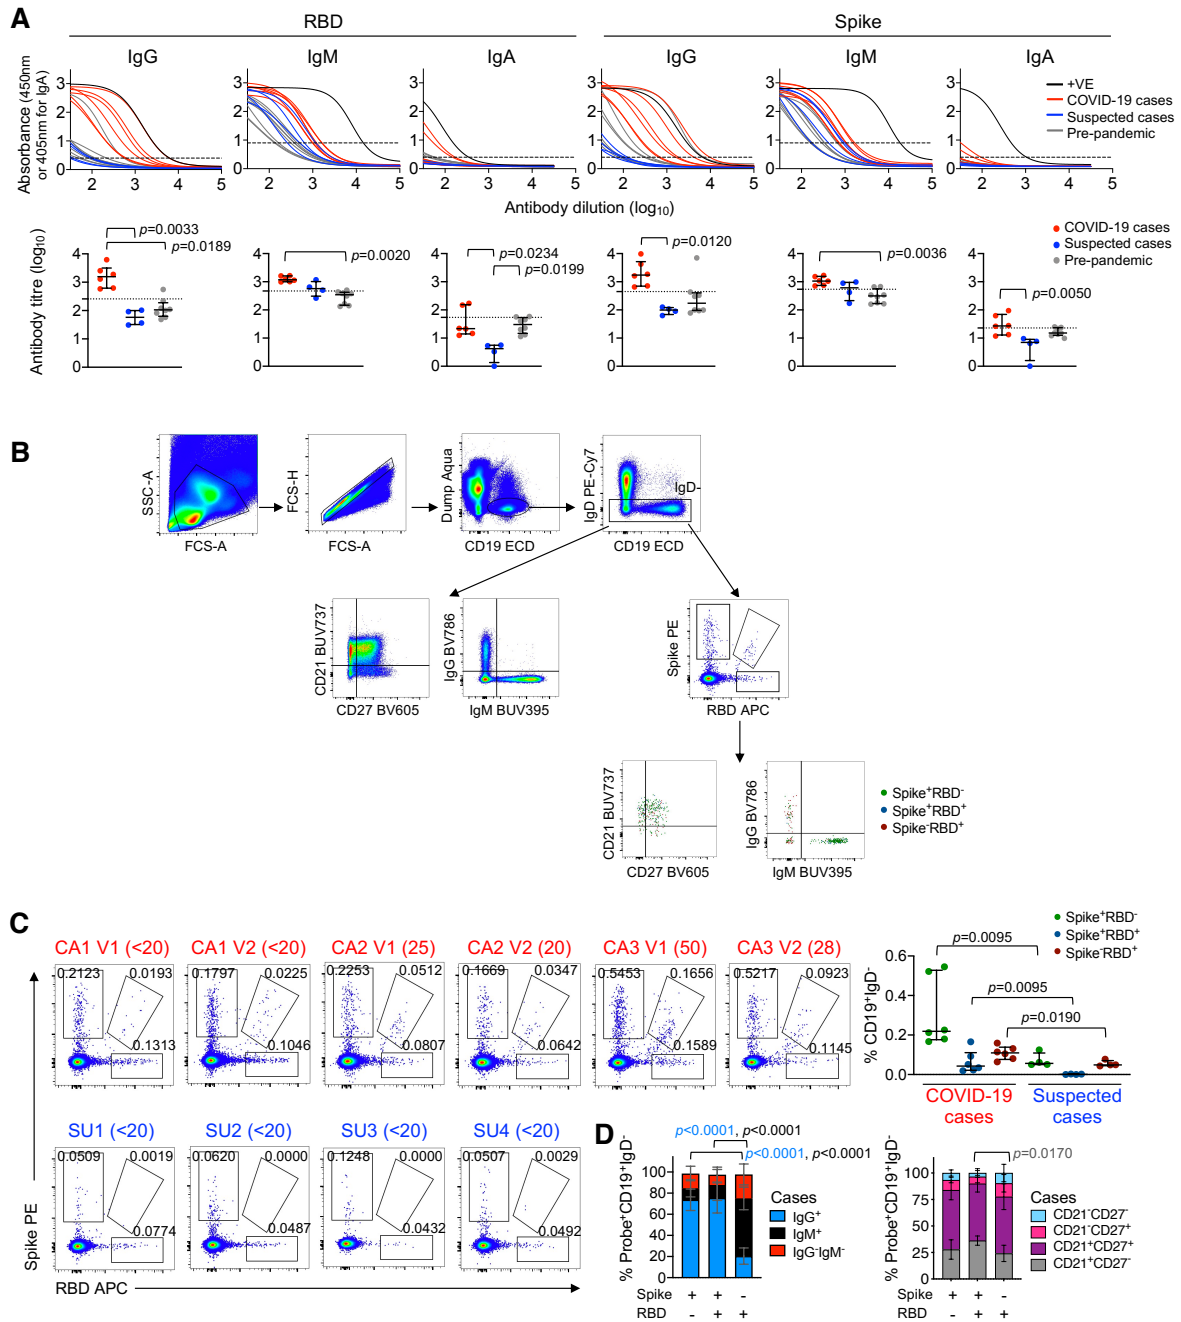

**Figure S1. COVID-19 traveller cohort, SARS-CoV-2-reactive antibody and B cell signatures.** (A) ELISA titration curves (top) against the SARS-CoV-2 RBD and Spike proteins for IgG, IgM and IgA in COVID-19 cases (CA,  $n=3$ , 2 time points each), suspected cases (SU,  $n=4$ ) and pre-pandemic healthy donors ( $n=8$ ). Dotted line indicates the cut off for end-point titer determination. End-point titers (bottom) of SARS-CoV-2 RBD and Spike antibodies where the dotted line indicates the seroconversion threshold. Statistical significance was determined with Kruskal-Wallis and Dunn's multiple comparisons test. (B) Gating strategy for

SARS-CoV-2-specific B cells. B cells were gated based on FSC/SSC, singlets, live cells with exclusion for T cell/NK cell/monocyte lineage markers, then expression of CD19, and gated as IgD<sup>-</sup>, IgM<sup>+/-</sup>, IgG<sup>+/-</sup> and analysed for binding to SARS-CoV-2 probes, with expression of CD21/CD27. (C) Co-staining of class-switched B cells (CD19<sup>+</sup>IgD<sup>-</sup>) with RBD and Spike probes. Microneutralization titres are bracketed and shown alongside the donor codes. Frequencies of Spike<sup>+</sup>, RBD<sup>+</sup> and Spike<sup>+</sup>RBD<sup>+</sup> B cells as a proportion of CD19<sup>+</sup>IgD<sup>-</sup> B cells in PBMCs from COVID-19 cases (n=3, 2 time points each) and suspected cases (n=4); data are shown as median with IQR. Statistical significance was determined with Mann-Whitney test. (D) Isotype distribution (left) and memory B cell phenotypes (right) of Spike<sup>+</sup>, RBD<sup>+</sup> and Spike<sup>+</sup>RBD<sup>+</sup> CD19<sup>+</sup>IgD<sup>-</sup> B cells; data are shown as mean with SD. Statistical significance was determined with Tukey's multiple comparisons test. Related to Figure 1.

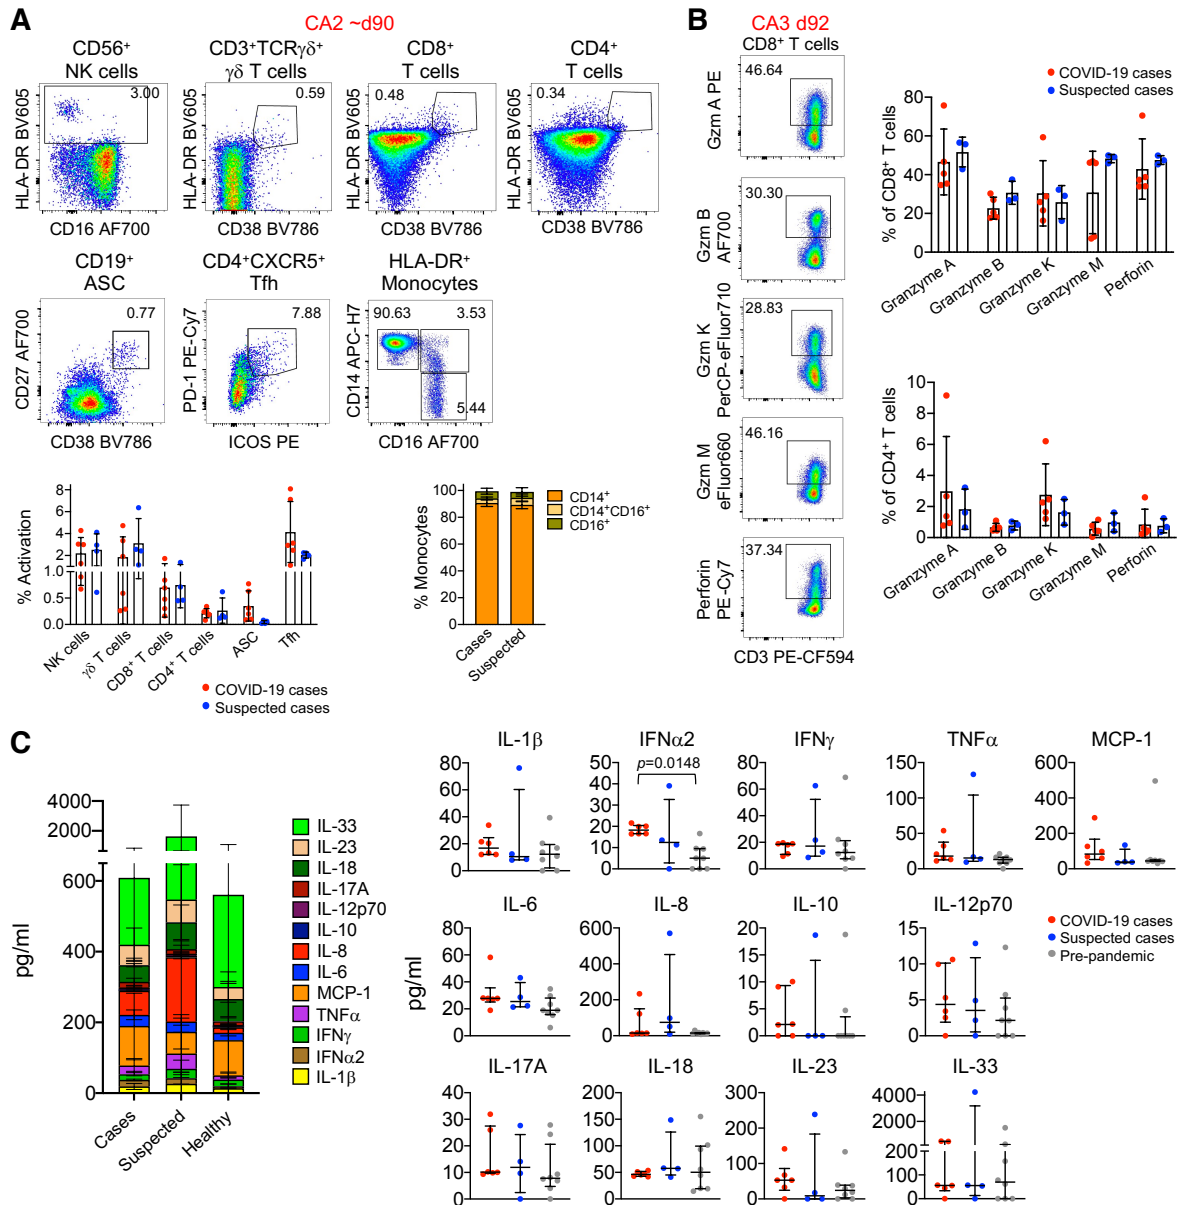

**Figure S2. Lack of immune cell activation in traveller cohort at convalescence.** (A) Representative FACS plots of activated CD38<sup>+</sup> NK cells, activated CD38<sup>+</sup>HLA-DR<sup>+</sup>  $\gamma\delta$ , CD8<sup>+</sup> and CD4<sup>+</sup> T cells, as well as activated CD38<sup>+</sup>CD27<sup>+</sup> ASC, ICOS<sup>+</sup>PD-1<sup>+</sup> Tfh and monocytes in a COVID-19 case. Proportion of activated immune cells (left) and monocyte subsets (right) in COVID-19 cases (n=3, 2 time points each) and suspected cases (n=4); data are shown as mean with SD. (B) Representative FACS plots of CD8<sup>+</sup> T cells expressing different cytotoxic molecules (Granzyme A, B, K, and M and perforin) in a COVID-19 case. Proportion of cytotoxic CD8<sup>+</sup> and CD4<sup>+</sup> T cells in COVID-19 cases (n=3, 1 time point for CA1, 2 time points

for CA2, CA3) and suspected cases (n=3); data are shown as mean with SD. T cells were gated based on FSC/SSC, singlets, CD3<sup>+</sup> T cells with exclusion for B cell/monocyte markers, then gated as CD4<sup>+</sup> or CD8<sup>+</sup> and analyzed for expression of granzyme A, B, K and M and perforin. (C) Total (left) and individual (right) levels across 13 cytokines in COVID-19 cases (n=3, 2 time points each), suspected cases (n=4) and healthy donors (n=8); data are shown as mean with SD and median with IQR, respectively. Statistical significance was determined with Kruskal-Wallis and Dunn's multiple comparisons test. Related to Figure 1.

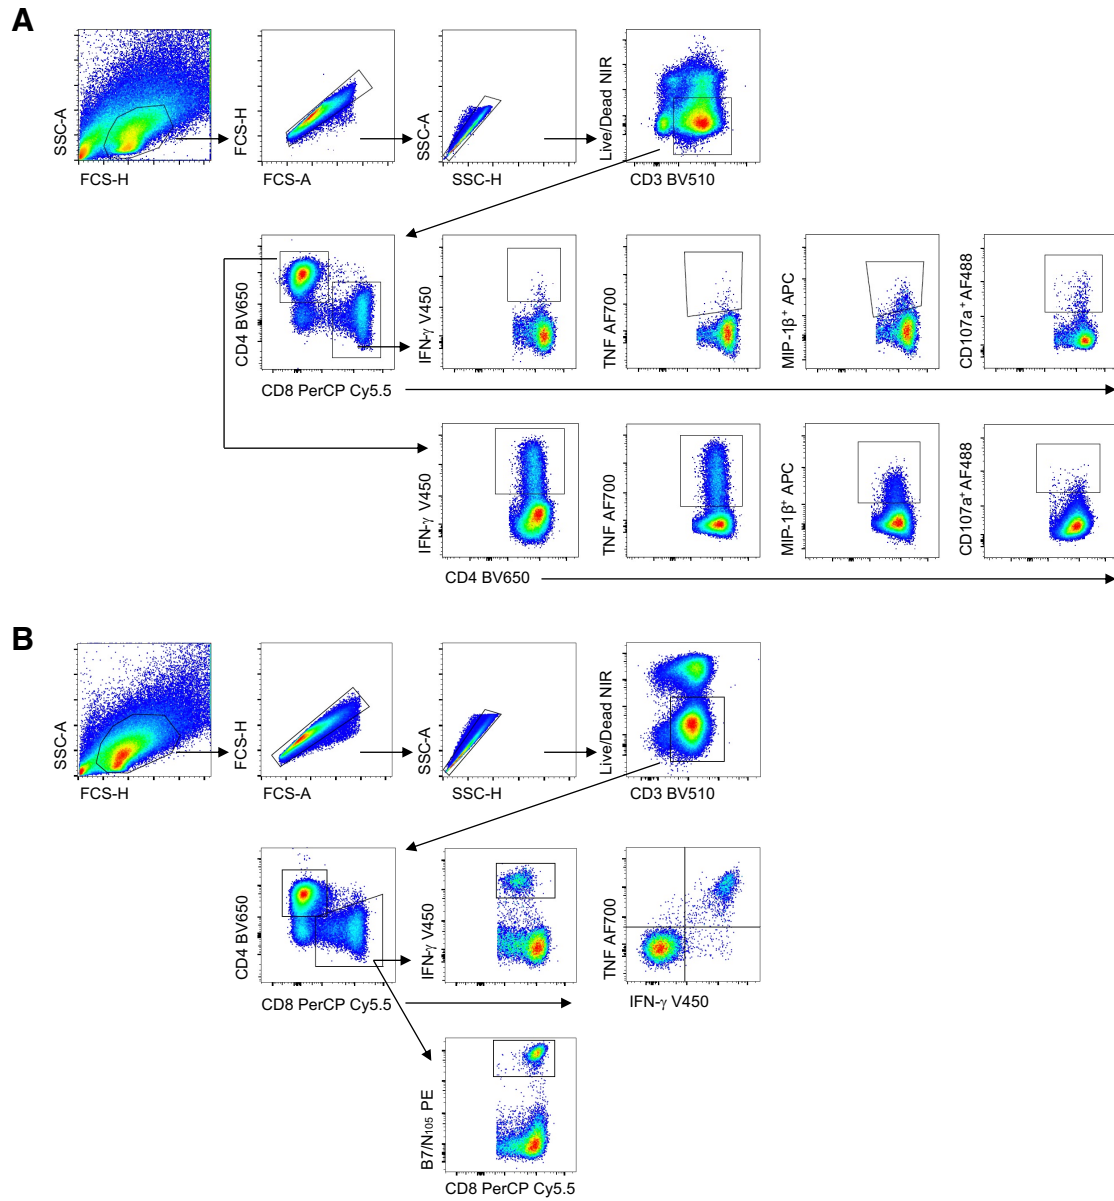

**Figure S3. Gating strategies for CD4<sup>+</sup> and CD8<sup>+</sup> T cell responses to SARS-CoV-2 overlapping peptide pools. (A) ICS gating strategy for intracellular IFN- $\gamma$ , TNF, MIP-1 $\beta$  and CD107a after PBMCs were stimulated for 10 days with SARS-CoV-2 overlapping peptide pools. (B) Gating strategy after day 10-cultured CD8<sup>+</sup> T cells were dissected with individual peptides and assessed by ICS or by tetramer staining. Related to Figure 1.**

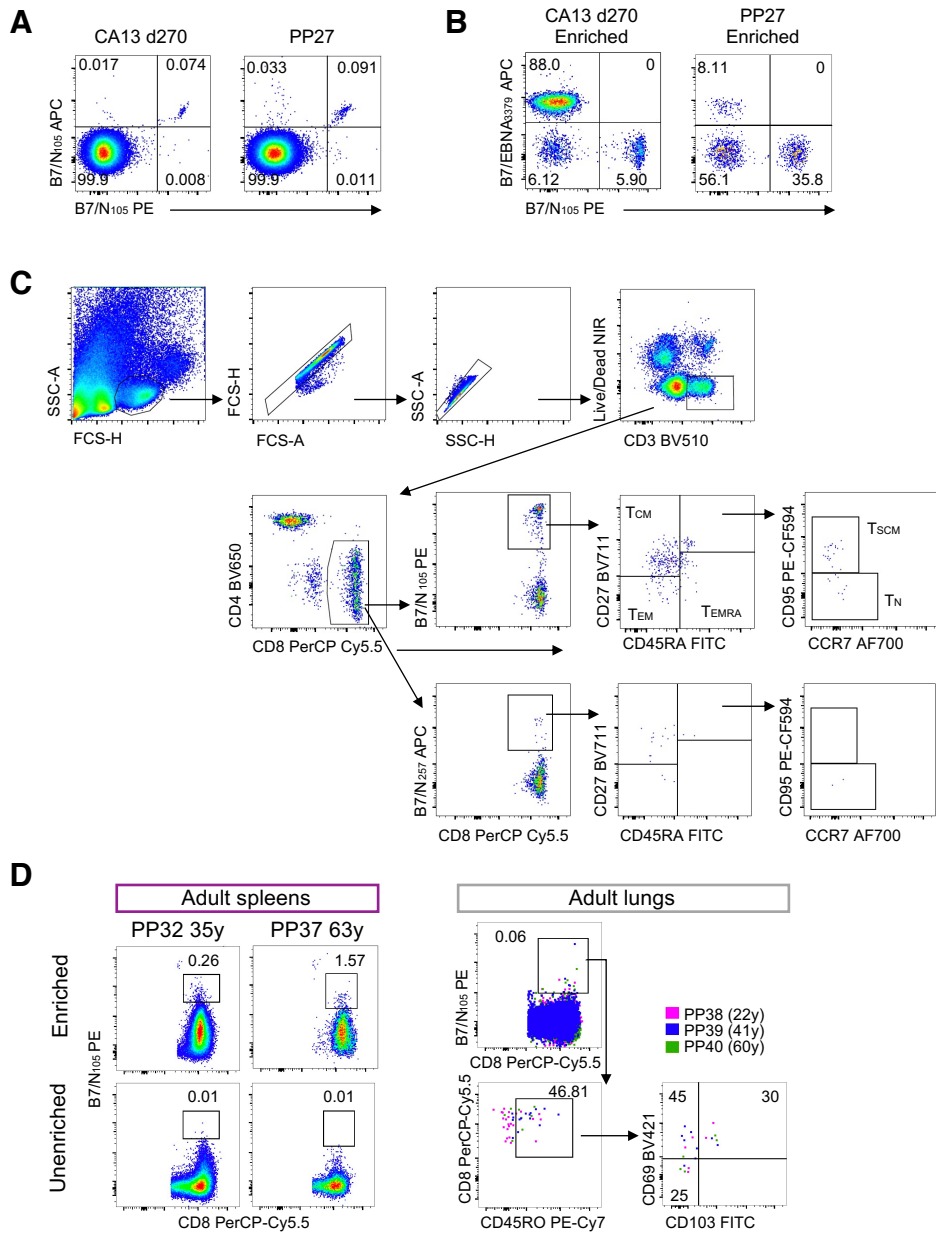

**Figure S4. B7/N<sub>105</sub><sup>+</sup>CD8<sup>+</sup> tetramer validation and staining in spleen and lungs.** (A) FACS plots showing direct *ex vivo* dual-tetramer staining of the immunodominant B7/N<sub>105</sub> tetramer conjugated to PE and APC fluorophores in a COVID-19 and pre-pandemic donor. (B) TAME-enriched tetramer populations using B7/N<sub>105</sub> tetramer-PE and an irrelevant B7/EBV-tetramer (EBNA-3<sub>379-387</sub>, RPPIFIRRL) conjugated to APC, representing 2 out of 4 experiments. Cells were gated on the total CD8<sup>+</sup> T cell population. (C) Gating strategy of enriched tetramer<sup>+</sup> cells and phenotype populations. (D) B7/N<sub>105</sub> tetramer staining of adult spleens following TAME enrichment (showing 2 out of 6 experiments) and direct tetramer staining of lung cells (non-

enriched) from 3 donors as concatenated FACS plots. Spleen and lungs were gated on CD8<sup>+</sup> T cells. Related to Figure 2 and Figure 3.



TCR-α

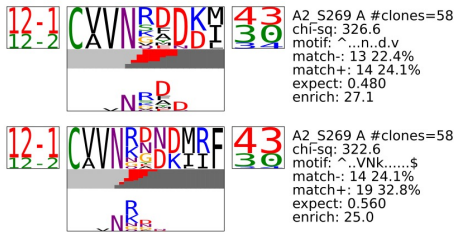

TCR-β

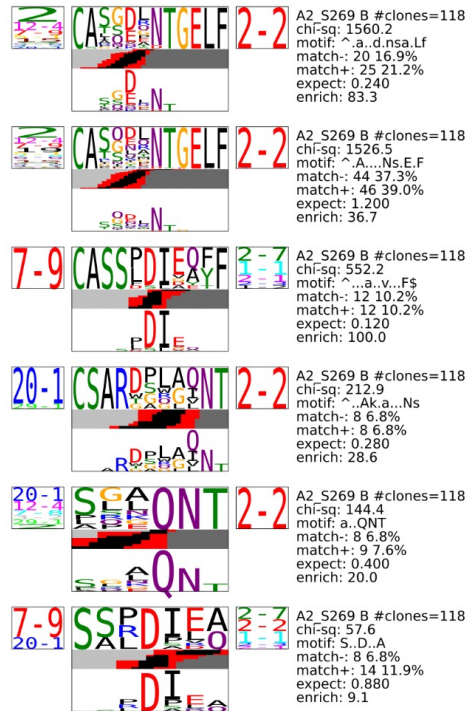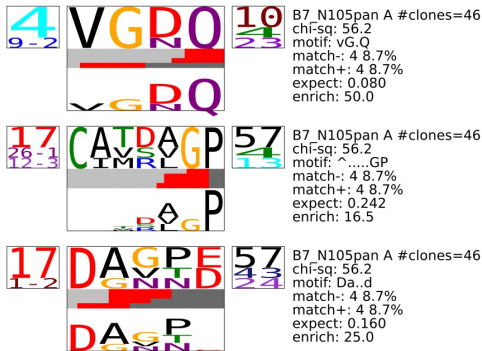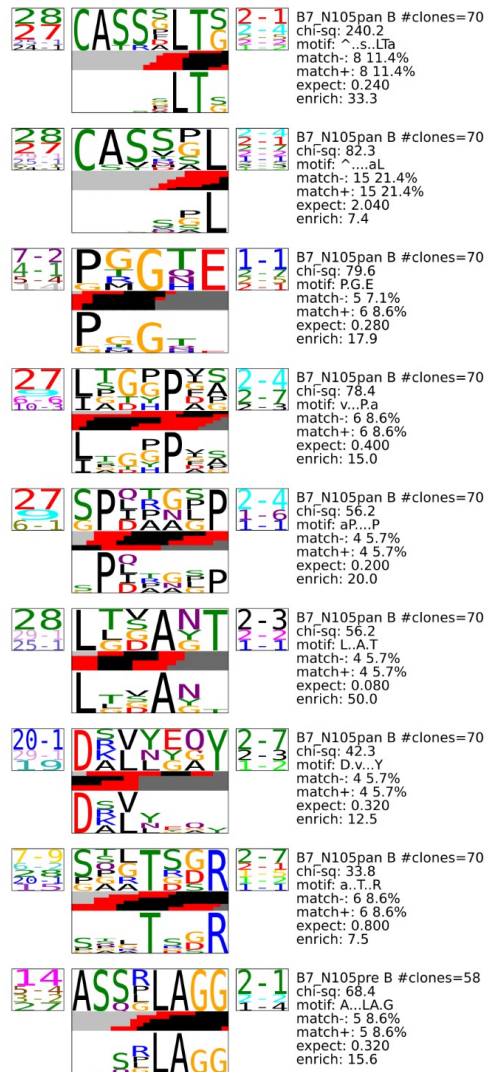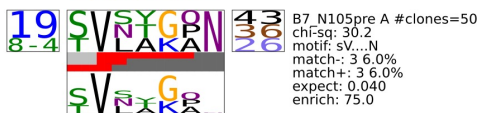

**Figure S5. TCRdist analysis of alpha and beta motifs for COVID-19 epitopes.** Enriched alpha and beta amino acid motifs in the CDR3 region were generated by TCRdist for all TCR pairs. Each TCR chain motif depicts the variable (left side) and joining (right side) gene frequencies, CDR3 amino acid sequences (middle), and inferred rearrangement structure (bottom bars coloured by source region: light grey = V-region, dark grey = J-region, black = diversity (D)-region, red = insertions). Chi-squared values greater than 50 were considered highly significant, values below 50 were borderline significant. Related to Figure 7.

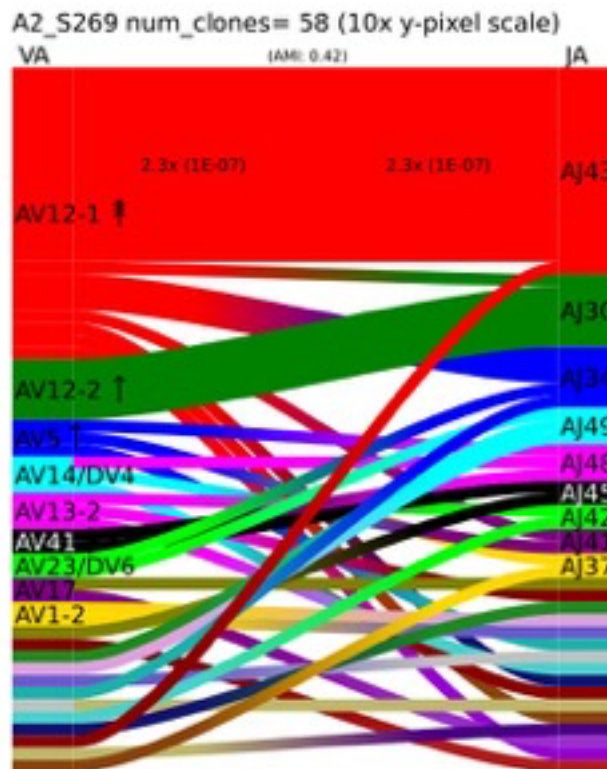

**Figure S6. Significant TRAV12-1 to AJ43 gene pairing for the A2/S269 epitope.** Gene segment usage and pairing landscapes are shown for the dominant A2/S269 TCR motif. Each clonotype is assigned the same vertical length irrespective of clonotype size. Each vertical stack reflects the V (left) and J (right) gene segment usage and pairing is shown by curved connecting lines. Genes are ranked in colour by the frequency distribution with red being the highest frequency, followed by green, dark blue, aqua, magenta, black and thereafter. Enrichment or depletion of gene usage is indicated by up or down arrows respectively where 1 arrowhead correlates to a 2-fold increase or decrease. Related to Figure 7.

## Supplementary Tables

**Table S1.** Donor demographics and clinical data. Related to Figure 1.

| Donor | Age | Sex | Specimen                     | Cohort             | Days post disease onset |                   |                   |         | Location during disease | Oxygen                | HLA-A                | HLA-B                |
|-------|-----|-----|------------------------------|--------------------|-------------------------|-------------------|-------------------|---------|-------------------------|-----------------------|----------------------|----------------------|
|       |     |     |                              |                    | Acute                   | Visit 1           | Visit 2           | Visit 3 |                         |                       |                      |                      |
| CA1   | 24  | M   | Heparinized blood            | COVID-19 Case      | -                       | 5*                | 9*                | -       | Asymptomatic/home       | No                    | 01:01, 32:01         | 08:01, 14:01         |
| CA2   | 21  | M   | Heparinized blood            | COVID-19 Case      | -                       | ~90 <sup>#</sup>  | ~160 <sup>#</sup> | -       | Overseas                | No                    | <b>02:01</b> , 11:01 | <b>07:02</b> , 55:01 |
| CA3   | 19  | M   | Heparinized blood            | COVID-19 Case      | -                       | 92                | 162               | -       | Overseas                | No                    | 1:01                 | 08:01, 52:01         |
| CA4   | 32  | F   | Heparinized blood            | COVID-19 Case      | -                       | 45                | -                 | -       | Home                    | No                    | 03:01, 11:01         | <b>07:02</b> , 50:01 |
| CA5   | 49  | F   | Heparinized blood            | COVID-19 Case      | -                       | 47                | 208               | -       | Home                    | No                    | 02:01, 03:01         | <b>07:02</b> , 55:01 |
| CA6   | 52  | M   | Heparinized blood            | COVID-19 Case      | -                       | 41                | 81                | 142     | Home                    | No                    | 02:01, <b>24:02</b>  | <b>07:02</b> , 40:01 |
| CA7   | 57  | F   | Heparinized blood            | COVID-19 Case      | 16                      | 108               | -                 | -       | Ward                    | No                    | 01:01, 02:01         | <b>07:02</b> , 38:01 |
| CA8   | 58  | F   | Heparinized blood            | COVID-19 Case      | 7                       | 74                | -                 | -       | Ward                    | Nasal prong           | 02:01, 24:02         | <b>07:02</b>         |
| CA9   | 59  | M   | Heparinized blood            | COVID-19 Case      | -                       | 69                | 216               | -       | Home                    | No                    | 01:01, 02:01         | <b>07:02</b> , 08:01 |
| CA10  | 65  | M   | Heparinized blood            | COVID-19 Case      | -                       | 46                | 135               | 217     | Home                    | No                    | 02:01, <b>24:02</b>  | <b>07:02</b>         |
| CA11  | 69  | M   | Heparinized blood            | COVID-19 Case      | -                       | 66                | 128               | 233     | Home                    | No                    | 02:01, 03:01         | <b>07:02</b> , 27:05 |
| CA12  | 72  | F   | Heparinized blood            | COVID-19 Case      | 11                      | 38                | -                 | -       | Ward                    | Supplemental          | 02:01                | <b>07:02</b> , 15:18 |
| CA13  | 74  | M   | Heparinized blood            | COVID-19 Case      | -                       | 90                | 178               | 270     | Home                    | No                    | 03:01, 26:01         | <b>07:02</b> , 40:01 |
| CA14  | 38  | M   | Heparinized blood            | COVID-19 Case      | 6                       | 41                | -                 | -       | Ward                    | No                    | <b>02:01</b>         | 15:01, 37:01         |
| CA15  | 50  | F   | Heparinized blood            | COVID-19 Case      | 8                       | -                 | -                 | -       | Ward                    | Nasal prong           | <b>02:01</b> , 68:01 | 15:01, 40:01         |
| CA16  | 51  | M   | Heparinized blood            | COVID-19 Case      | 11                      | -                 | -                 | -       | Ward                    | No                    | <b>02:01</b> , 03:01 | 07:02, 39:10         |
| CA17  | 52  | F   | Heparinized blood            | COVID-19 Case      | 5                       | -                 | -                 | -       | ICU                     | High flow nasal prong | <b>02:01</b> , 68:01 | 08:01, 44:02         |
| CA18  | 54  | M   | Heparinized blood            | COVID-19 Case      | -                       | 46                | -                 | -       | Ward                    | No                    | <b>02:01</b> , 31:01 | 38:01, 44:03         |
| CA19  | 56  | M   | Heparinized blood            | COVID-19 Case      | -                       | 145               | -                 | -       | Home                    | No                    | <b>02:01</b> , 26:01 | 44:02                |
| CA20  | 58  | M   | Heparinized blood            | COVID-19 Case      | -                       | 71                | -                 | -       | Home                    | No                    | <b>24:02</b>         | 35:01, 55:01         |
| CA21  | 75  | M   | Heparinized blood            | COVID-19 Case      | -                       | 121               | -                 | -       | Home                    | No                    | 01:01, <b>24:02</b>  | 08:01, 14:02         |
| SU1   | 20  | M   | Heparinized blood            | Suspected case     | -                       | ~160 <sup>^</sup> | -                 | -       | Asymptomatic/overseas   | -                     | -                    | -                    |
| SU2   | 20  | M   | Heparinized blood            | Suspected case     | -                       | ~160 <sup>^</sup> | -                 | -       | Asymptomatic/overseas   | -                     | -                    | -                    |
| SU3   | 20  | M   | Heparinized blood            | Suspected case     | -                       | ~160 <sup>^</sup> | -                 | -       | Asymptomatic/overseas   | -                     | -                    | -                    |
| SU4   | 20  | M   | Heparinized blood            | Suspected case     | -                       | ~160 <sup>^</sup> | -                 | -       | Asymptomatic/overseas   | -                     | -                    | -                    |
| PP1   | 21  | M   | Heparinized blood            | Pre-pandemic Adult | -                       | -                 | -                 | -       | -                       | -                     | -                    | -                    |
| PP2   | 23  | M   | Heparinized blood            | Pre-pandemic Adult | -                       | -                 | -                 | -       | -                       | -                     | -                    | -                    |
| PP3   | 24  | M   | Heparinized blood            | Pre-pandemic Adult | -                       | -                 | -                 | -       | -                       | -                     | -                    | -                    |
| PP4   | 26  | M   | Heparinized blood            | Pre-pandemic Adult | -                       | -                 | -                 | -       | -                       | -                     | -                    | -                    |
| PP5   | 27  | M   | Heparinized blood            | Pre-pandemic Adult | -                       | -                 | -                 | -       | -                       | -                     | -                    | -                    |
| PP6   | 28  | M   | Heparinized blood            | Pre-pandemic Adult | -                       | -                 | -                 | -       | -                       | -                     | -                    | -                    |
| PP7   | 31  | M   | Heparinized blood            | Pre-pandemic Adult | -                       | -                 | -                 | -       | -                       | -                     | -                    | -                    |
| PP8   | 31  | M   | Heparinized blood            | Pre-pandemic Adult | -                       | -                 | -                 | -       | -                       | -                     | -                    | -                    |
| PP9   | 3   | F   | Tonsil/<br>Heparinized blood | Pre-pandemic Child | -                       | -                 | -                 | -       | -                       | -                     | 03:01                | <b>07:02</b>         |
| PP10  | 5   | M   | Tonsil/<br>Heparinized blood | Pre-pandemic Child | -                       | -                 | -                 | -       | -                       | -                     | 03:01                | <b>07:02</b> , 57:01 |
| PP11  | 7   | F   | Tonsil/<br>Heparinized blood | Pre-pandemic Child | -                       | -                 | -                 | -       | -                       | -                     | 01:01, 03:01         | <b>07:02</b> , 08:01 |
| PP12  | 15  | M   | Tonsil/<br>Heparinized blood | Pre-pandemic Child | -                       | -                 | -                 | -       | -                       | -                     | 03:01                | <b>07:02</b> , 14:01 |
| PP13  | 30  | M   | Buffy pack                   | Pre-pandemic Adult | -                       | -                 | -                 | -       | -                       | -                     | 01:01, <b>24:02</b>  | <b>07:02</b> , 57:01 |
| PP14  | 35  | F   | Buffy pack                   | Pre-pandemic Adult | -                       | -                 | -                 | -       | -                       | -                     | 01:01, 03:01         | <b>07:02</b> , 08:01 |
| PP15  | 36  | F   | Buffy pack                   | Pre-pandemic Adult | -                       | -                 | -                 | -       | -                       | -                     | 02:01, 02:05         | <b>07:02</b> , 41:01 |

|      |    |     |                   |                      |   |   |   |   |   |                        |                         |
|------|----|-----|-------------------|----------------------|---|---|---|---|---|------------------------|-------------------------|
| PP16 | 45 | N/A | Buffy pack        | Pre-pandemic Adult   | - | - | - | - | - | 03:01,<br>11:01        | <b>07:02</b> ,<br>15:01 |
| PP17 | 47 | M   | Heparinized blood | Pre-pandemic Adult   | - | - | - | - | - | 03:01,<br>26:01        | <b>07:02</b> ,<br>15:01 |
| PP18 | 49 | M   | Buffy pack        | Pre-pandemic Adult   | - | - | - | - | - | 01:01,<br>31:01        | <b>07:02</b> ,<br>08:01 |
| PP19 | 55 | M   | Buffy pack        | Pre-pandemic Adult   | - | - | - | - | - | 02:01;<br>03:01        | <b>07:02</b> ;<br>57:01 |
| PP20 | 60 | N/A | Buffy pack        | Pre-pandemic Adult   | - | - | - | - | - | 24:02,<br>25:01        | <b>07:02</b> ,<br>18:01 |
| PP21 | 63 | N/A | Buffy pack        | Pre-pandemic Adult   | - | - | - | - | - | 03:01,<br>26:01        | <b>07:02</b> ,<br>44:02 |
| PP22 | 65 | F   | Buffy pack        | Pre-pandemic Elderly | - | - | - | - | - | 02:01,03:01            | <b>07:02</b> ,<br>44:03 |
| PP23 | 69 | N/A | Buffy pack        | Pre-pandemic Elderly | - | - | - | - | - | 02:01,<br>32:01        | <b>07:02</b> ,<br>44:03 |
| PP24 | 69 | N/A | Buffy pack        | Pre-pandemic Elderly | - | - | - | - | - | 11:01                  | <b>07:02</b>            |
| PP25 | 72 | N/A | Buffy pack        | Pre-pandemic Elderly | - | - | - | - | - | 02:01,11:01            | <b>07:02</b> ,<br>44:02 |
| PP26 | 73 | N/A | Buffy pack        | Pre-pandemic Elderly | - | - | - | - | - | 01:01,<br>03:01        | <b>07:02</b> ,<br>08:01 |
| PP27 | 76 | M   | Buffy pack        | Pre-pandemic Elderly | - | - | - | - | - | 01:01                  | <b>07:02</b> ,<br>08:01 |
| PP28 | 76 | F   | Heparinized blood | Pre-pandemic Elderly | - | - | - | - | - | 01:01,<br>31:01        | <b>07:02</b> ,<br>44:03 |
| PP29 | 24 | M   | Heparinized blood | Pre-pandemic Adult   | - | - | - | - | - | 02:03,<br><b>24:02</b> | 27:06,<br>40:01         |
| PP30 | 59 | M   | Heparinized blood | Pre-pandemic Adult   | - | - | - | - | - | <b>24:02</b>           | 07:02                   |
| PP31 | 32 | M   | Heparinized blood | Pre-pandemic Adult   | - | - | - | - | - | 01:01,<br><b>24:02</b> | 07:06,<br>15:02         |
| PP32 | 35 | M   | Spleen            | Pre-pandemic Adult   | - | - | - | - | - | 1, 68                  | 7, 18                   |
| PP33 | 41 | F   | Spleen            | Pre-pandemic Adult   | - | - | - | - | - | 2, 25                  | 7, 8                    |
| PP34 | 46 | M   | Spleen            | Pre-pandemic Adult   | - | - | - | - | - | 02:01,<br>03:01        | <b>07:02</b> ,<br>57:01 |
| PP35 | 49 | M   | Spleen            | Pre-pandemic Adult   | - | - | - | - | - | 2, 3                   | 7, 57                   |
| PP36 | 59 | M   | Spleen            | Pre-pandemic Adult   | - | - | - | - | - | 2                      | 7                       |
| PP37 | 63 | F   | Spleen            | Pre-pandemic Adult   | - | - | - | - | - | 02:01,<br>24:02        | <b>07:02</b> ,<br>15:01 |
| PP38 | 22 | M   | Lung              | Pre-pandemic Adult   | - | - | - | - | - | 2, 32                  | 7, 8                    |
| PP39 | 41 | F   | Lung              | Pre-pandemic Adult   | - | - | - | - | - | 2, 25                  | 7, 8                    |
| PP40 | 60 | F   | Lung              | Pre-pandemic Adult   | - | - | - | - | - | 3                      | 7, w6                   |

\*Days are calculated from first positive PCR result for CA1 after returning home from overseas for ~3 months.

#Days are approximate after they experienced mild symptoms while travelling overseas with CA1 and CA3.

^Days are approximate from the time they travelled overseas with suspected COVID-19, but PCR-negative on return.

HLA in bold were analysed for COVID-19-specific T cell responses or TCRs.

**Table S2. B7/N105<sup>+</sup>CD8<sup>+</sup> TCRab repertoires. Related to Figure 5.**

| TRB V | TRB J | CDR3β                | TRAV  | TRA J | CDR3α             | #0 | CA 5 | CA 2 | CA 4 | BP12 4 | BP15 5 | BP16 1 | BP16 0 |
|-------|-------|----------------------|-------|-------|-------------------|----|------|------|------|--------|--------|--------|--------|
| 20-1  | 2-1   | CSARDTAGATYNEQFF     | ND    | ND    | ND                |    |      |      |      |        |        |        |        |
| 20-1  | 2-1   | CSAWRGRGADNEQFF      | ND    | ND    | ND                |    |      |      |      | 1      |        |        |        |
| 28    | 2-3   | CASMPGLEVLDTQYF      | ND    | ND    | ND                |    |      |      |      |        |        | 1      |        |
| 28    | 2-5   | CASSDRGMGETQYF       | ND    | ND    | ND                |    |      |      |      |        |        | 1      |        |
| 29-1  | 2-5   | CSVVGTGGPETQYF       | ND    | ND    | ND                |    |      |      |      |        |        | 1      |        |
| 29-1  | 2-7   | CSVVPLAGPYEQYF       | ND    | ND    | ND                |    |      |      |      |        |        | 1      |        |
| 7-2   | 1-1   | CASRGGGTEAFF         | ND    | ND    | ND                |    |      | 4    |      |        |        | 2      |        |
| 28    | 2-1   | CASSSLASSSYNEQFF     | 1-1   | 16    | CAVRG#FSDGQKLLF   |    |      |      | 1    |        |        |        |        |
| 6-5   | 2-1   | CASSYYGVNEQFF        | 1-1   | 39    | CAVT#NAGNMLTF     |    |      |      |      |        | 1      |        |        |
| 18    | 1-3   | CASSQGPYSGNTIYF      | 1-1   | 40    | CAVRTP#TSGTYKYI   |    |      |      |      |        |        | 1      |        |
| 27    | 1-4   | CASSLLAGGRAADKEKLF   | 1-2   | 18    | CAA#DRGSTLGRLYF   |    |      |      |      |        | 1      |        |        |
| 2     | 2-4   | CASSEEIAKNIQYF       | 1-2   | 31    | CAVRVFNARLMF      |    |      | 1    |      |        |        |        |        |
| 5-4   | 2-4   | CASSLETGRNIQYF       | 1-2   | 35    | WAIGFGNVLHC       |    |      |      | 2    |        |        |        |        |
| 20-1  | 1-6   | CSARDRTDSYNSPLHF     | 1-2   | 43    | CADANNDMRF        |    |      |      | 1    |        |        |        |        |
| ND    | ND    | ND                   | 1-2   | 6     | CAVRDRGLTGGSYIPTF |    |      |      |      | 1      |        |        |        |
| 2     | 2-1   | CASSELDGRL           | 10    | 18    | CVVSTLGRLYF       |    |      |      |      |        |        | 1      |        |
| 27    | 2-4   | CASSPLTGGPPVAKNIQYF  | 10    | 20    | CVPRA#KLSF        |    | 1    |      |      |        |        |        |        |
| 27    | 2-4   | CASNPLAGEFTAKNIQYF   | 10    | 31    | CVVNGRDARLMF      |    |      |      | 9    |        |        |        |        |
| 4-1   | 2-7   | CASSPGTSEYQYF        | 10    | 42    | CVVSAH#YGGSQGNLIF |    |      |      |      | 1      |        |        |        |
| 2     | 2-1   | CASSEAELAGGQL#SYNEQF | 12-1  | 12    | CVVNVVDSSYKLI     |    |      | 1    |      |        |        |        |        |
| 20-1  | 2-7   | CSASGRDSVYEQYF       | 12-1  | 8     | ND                |    |      | 1    |      |        |        |        |        |
| 9     | 2-2   | CASSVTANTGELFF       | 12-2  | 16    | CAVTRFSDGQKLLF    | 1  |      |      |      |        |        |        |        |
| 28    | 1-6   | ND                   | 12-3  | 13    | CAMSLPGGYQKVTF    |    |      | 1    |      |        |        |        |        |
| 25-1  | 2-1   | CASSGLTSAKNEQFF      | 13-1  | 11    | CAASPLGGYSTLTF    |    |      |      | 1    |        |        |        |        |
| 29-1  | 2-3   | CSVDALLGAYTQYF       | 13-1  | 20    | CAALPSADYKLSF     |    |      |      | 2    |        |        |        |        |
| 20-1  | 2-7   | CSAATRDVYEQYF        | 13-1  | 21    | NFNKIFY           |    |      |      | 1    |        |        |        |        |
| 28    | 1-2   | CASSGLTSDRAKYGYTF    | 13-1  | 3     | CAASXXQTVXQXXX    |    |      |      | 1    |        |        |        |        |
| 6-5   | 1-1   | CASSYSNPGQGAEEFF     | 13-1  | 4     | #                 |    |      |      | 1    |        |        |        |        |
| 29-1  | 2-7   | CSVVPLAGPYEQYF       | 13-1  | 44    | LCXXPXXXXXQ'XX#F  |    |      |      | 1    |        |        |        |        |
| 29-1  | 2-7   | CSVVPLMGGEYQYF       | 13-1  | 44    | CAALAGTASKLTF     |    |      |      |      |        |        | 8      |        |
| 10-3  | 2-3   | CAISDYPGPKTQDTQYF    | 13-1  | 9     | CACLTGTASKLTF     |    |      |      | 2    |        |        |        |        |
| 12-3  | 2-2   | CASSAGLAGANTGELFF    | 13-2  | 16    | ND                | 1  |      |      |      |        |        |        |        |
| 5-5   | 2-2   | CASIPTRDTGELFF       | 13-2  | 17    | CAENQRFSDGQKLLF   |    |      |      | 1    |        | 1      |        |        |
| ND    | ND    | ND                   | 13-2  | 28    | CAENLL#AAGNKLTF   |    |      |      | 1    |        | 1      |        |        |
| ND    | ND    | ND                   | 13-2  | 49    | CAEIKRSGAGSYQLTF  |    |      |      |      |        |        |        |        |
| 14    | 2-7   | CASSRVPQGTGSYEQYF    | 13-2  | 49    | CADPNTGNQFYF      |    |      |      |      |        |        | 1      | 26     |
| 7-6   | 2-7   | CASSRRWGSSEYQYF      | 13-2  | 49    | XAXXNTXXXFYF      |    |      |      |      |        |        |        | 1      |
| 9     | 2-3   | CASSPTDNF            | 13-2  | 49    | CADPNTGNQFYF      |    |      |      |      |        |        |        | 3      |
| 25-1  | 2-3   | CASSPGDTQYF          | 13-2  | 50    | CADPNTGNQFYF      |    |      |      |      |        |        | 1      |        |
| 11-2  | 2-7   | CASSHLMAGGRYEQYF     | 14/DV | 13    | CAEKTSYDKVIF      |    |      |      |      |        |        |        |        |
| 20-1  | 2-1   | CSARRGLNEQFF         | 14/DV | 20    | XXXXXXSGXDHKXXX   |    |      |      |      | 1      |        |        |        |
| 2     | 1-3   | CAAVRPSTIYF          | 14/DV | 29    | F                 |    |      |      |      |        |        |        |        |
| 20-1  | 2-1   | CSARGGFRSGGGTDEQFF   | 14/DV | 31    | CAMREGYSNDYKLSF   |    |      |      |      |        | 1      |        |        |
| 9     | 2-7   | CASSLGTGPFSEYQYF     | 14/DV | 37    | CAMRGSNTXXXF      |    |      |      | 1    |        |        |        |        |
| 9     | 2-1   | CASSSKPGGDYNEQFF     | 14/DV | 9     | CAMRGSARLMF       |    | 3    |      |      |        |        |        |        |
| ND    | ND    | ND                   | 16    | 12    | CXMRGXXSNTGKLIF   | 1  |      |      |      |        |        |        |        |
| 4-1   | 2-7   | CASSQWSGSPSYEQYF     | 16    | 12    | CAITGGFKTIF       |    |      |      | 2    |        |        |        |        |
| 7-9   | 1-5   | CASSLTGSRNQPQHF      | 16    | 39    | CAEGDSSYKLI       |    |      |      |      | 1      |        |        |        |
| 5-6   | 1-5   | CASSRRATGNYQPQHF     | 16    | 8     | CALP#SSNTGKLIF    |    |      |      |      | 1      |        |        |        |
| 24-1  | 2-3   | CATSDLVSDTQYF        | 17    | 13    | CXIRNFWQATXS#F    |    | 1    |      |      |        |        | 1      |        |
| 7-9   | 2-1   | ND                   | 17    | 21    | XAXL#VF           |    |      |      |      |        |        |        |        |
| 4-1   | 2-5   | CASSQDGPGRQETQYF     | 17    | 22    | CDTAPERGGYQKVTF   |    |      |      | 1    |        |        |        |        |
| 27    | 1-1   | CASWTGAAEAF          | 17    | 24    | CVGADNFNKIFY      |    |      |      | 2    |        |        |        |        |
| 29-1  | 2-2   | CSVQGRGELFF          | 17    | 34    | CATDLIVSARQLTF    |    | 1    |      |      |        |        |        |        |
| 28    | 2-1   | CASNLRVDEQFF         | 17    | 47    | CATDGVTDSWGKLF    |    |      |      | 1    |        |        |        |        |
| 4-1   | 1-1   | CASSQSPGGTEAFF       | 17    | 48    | CATAGSYNTDKLIF    |    |      |      |      | 1      |        |        |        |
| 6-6   | 2-7   | CASRQLAGFYEQYF       | 17    | 57    | XXEWDGNKLVF       |    |      |      | 1    |        |        |        |        |
| 25-1  | 1-1   | CASSGLTDANTEAFF      | 19    | 11    | CATDD#GNEKLT      | 1  |      |      |      |        |        |        |        |
| 4-2   | 2-1   | CASSQTYPGAYNEQFF     | 19    | 11    | CATDAGPEKLVF      | 1  | 21   |      |      |        |        |        |        |
| 19    | 2-1   | CASSISGGYNEQFF       | 19    | 17    | CALTRSGYSTLTF     |    | 1    |      |      |        |        |        |        |
| 29-1  | 2-7   | CSVETPGVYEQYF        | 19    | 20    | CALSEAGSGYSTLTF   |    |      |      |      |        |        | 1      |        |
| 2     | 1-4   | CARRQGNELFF          | 19    | 26    | CALITIKAAAGNKLTF  |    |      |      |      |        |        | 1      |        |
| 14    | 2-2   | CASSQVLGPGLFF        | 19    | 30    | XAVXFRAXKDYKLSF   |    |      |      |      |        |        |        | 1      |
| 9     | 2-3   | CASSPTDNF            | 19    | 36    | CALSVNYGQNFV      |    |      |      |      |        |        |        |        |
| 9     | 2-1   | CASSARDF             | 19    | 54    | YFCXXSRSRDXKIIF   |    |      |      |      | 1      |        |        |        |
| 9     | 2-7   | CASGSGGEHF           | 19    | 56    | CALSVLTGANLFF     |    |      |      |      |        |        | 1      |        |
| 20-1  | 1-6   | CSATDRAASYNPLHF      | 20    | 13    | CALSEIQGAQKLVF    |    |      |      |      |        |        |        | 1      |
| 5-5   | 2-5   | CASSFTIAA#QETQYF     | 21    | 13    | CALSRVGANSKLT     |    |      |      |      |        |        | 1      |        |
| 20-1  | 2-1   | CSARAGIREGFYNEQFF    | 21    | 21    | CAVQGGNSGGYQKVTF  |    |      | 2    |      |        |        |        |        |
| 27    | 2-4   | CASSTIAGETKNIQYF     | 21    | 30    | CAVLNSGGYQKVTF    |    |      |      |      | 1      |        |        |        |
| 20-1  | 1-5   | CSATDRANVNQPQHF      | 23/DV | 40    | CGLRDNFNKIFY      |    | 1    |      | 1    |        |        |        |        |
| 24-1  | 1-2   | CATSDPTDRVDGYTF      | 24    | 40    | CAVPIMNRDDKIIF    |    |      | 1    |      |        |        |        |        |
| 28    | 2-2   | CASSFLTSANTGELFF     | 26-1  | 4     | CAASITPGTYKYIF    |    |      |      | 1    |        |        |        |        |
| 2     | 1-1   | CASRLANTEAFF         | 26-1  | 53    | CAFISTSGTYKYIF    |    |      |      |      | 1      |        |        |        |
| 9     | 1-6   | CASSVEGTVNSPLHF      | 26-2  | 12    | CIVRVGPGGYNKLIF   |    |      | 1    |      |        |        |        |        |
| 6-1   | 2-4   | CASSDIFLAKNIQYF      | 3     | 29    | CIVRLGGLGGGSNKLTF |    | 1    |      |      |        |        |        |        |
| 2     | 1-5   | CASSEAISTRAQHF       | 3     | 3     | CILRTPLDSSYKLI    | 1  |      |      |      |        |        |        |        |
| 29-1  | 1-1   | ND                   | 3     | 30    | CAVRVLTPLVF       |    |      |      |      | 1      |        |        |        |
| 9     | 2-1   | CASSVSGGAYNEQFF      | 3     | 31    | CXLRQEWX#KIIF     |    |      |      | 1    |        |        |        |        |
| 5-6   | 1-2   | CASSLGRAVIWGYTF      | 3     | 37    | ND                |    |      |      |      |        |        |        |        |
| 24-1  | 2-1   | CATSDLTGANEQFF       | 36/DV | 13    | CAVRDYNARLMF      | 26 |      |      |      |        |        |        |        |
| 3-1   | 2-3   | CASSQDLASSTDTQYF     | 38-1  | 4     | CAPPRGSSNTGKLIF   | 1  |      |      |      |        |        |        |        |
| ND    | ND    | ND                   | 38-1  | 44    | CAGDSGGYQKVTF     |    |      |      | 1    |        |        |        |        |
| 4-1   | 1-6   | CASSQDQAGSPLHF       | 4     | 10    | CAFLSGGYKLI       |    |      |      | 1    |        |        |        |        |
| 5-4   | 2-1   | CASSPPTGNEQFF        | 4     | 10    | CAFMKHRTGTASKLTF  |    |      |      |      |        |        | 1      |        |
| 6-1   | 2-7   | CASSDRTGRRNEQYF      | 4     | 10    | VLXGGXXXXF        |    |      |      |      |        |        |        | 1      |
| 7-2   | 1-5   | CASSLATGSGNQPQHF     | 4     | 10    | CLVGDQAGGGNKLTF   |    |      | 1    |      |        |        |        |        |
| 7-3   | 2-5   | CASSLGTGAQETQYF      | 4     | 10    | CLVAAPGNKLT       |    |      |      |      | 1      |        |        |        |
| 30    | 2-2   | CAWDYLTNTGELFF       | 4     | 13    | CLVGDQILTGGGNKLT  |    |      |      | 1    |        |        |        |        |
| 2     | 2-1   | SPAVHRVANNEQLF       | 4     | 16    | F                 |    |      |      |      |        |        | 1      |        |
| 4-2   | 2-7   | CASSQSGTGPYEQYF      | 4     | 18    | CLVGDGSHCGGYQKVTF |    |      |      | 1    |        |        |        |        |
|       |       |                      |       |       | F                 |    |      |      |      |        |        |        |        |



**Table S3.** A2/S269<sup>+</sup>CD8<sup>+</sup> TCRαβ repertoires. Related to Figure 6.

| TRBV | TRBJ | CDR3β             | TRAV   | TRAJ | CDR3α              | #02<br>0<br>Ac | #89<br>Ac | #8<br>9<br>F <sub>up</sub> | CA<br>6 | CA<br>7 | CA<br>2 |
|------|------|-------------------|--------|------|--------------------|----------------|-----------|----------------------------|---------|---------|---------|
| 19   | 2-2  | CATQNMNTGELFF     | ND     | ND   | ND                 |                |           |                            |         |         | 1       |
| 2    | 2-2  | CASSEIDTGELFF     | ND     | ND   | ND                 |                | 1         |                            |         |         |         |
| 7-9  | 2-7  | CASSPDIEQYF       | ND     | ND   | ND                 |                |           |                            |         | 1       |         |
| 4-2  | 2-3  | CASSQTESTDTQYF    | 1-1    | 37   | CAHWGSSNTGKLI      |                |           |                            |         |         | 1       |
| 3-1  | 2-2  | CASQLQNTGELFF     | 1-2    | 38   | XAVRDNAGXXXKI      |                |           |                            |         |         | 1       |
| 20-1 | 2-2  | CSARDPRAQNTGELFF  | 1-2    | 4    | CAGPPNKLIF         |                |           |                            |         |         | 1       |
| 20-1 | 1-2  | CSAQTDRLGGYTF     | 10     | 39   | CVVSAR#AGNMLTF     |                | 2         |                            |         |         |         |
| 3-1  | 2-2  | CAVQGMNTGELFF     | 10     | 55   | ND                 |                | 1         |                            |         |         |         |
| 28   | 2-2  | CASSPTGGGNTGELFF  | 12-1   | 11   | CVVNEPLSGYSTLTF    |                | 1         |                            |         |         |         |
| 29-1 | 2-2  | CSARGLAELANTGELFF | 12-1   | 15   | CVVNIPQAGTALIF     |                | 1         | 2                          |         |         |         |
| 13   | 2-2  | CASSFPGGGNTGELFF  | 12-1   | 24   | CVVNAADSWGKLFQ     |                |           |                            |         |         | 1       |
| 20-1 | 2-2  | CSARGGQGLNTGELFF  | 12-1   | 29   | CVVNLPEGNTPLVF     |                |           |                            |         |         | 1       |
| 7-9  | 2-7  | CASSLDIEQYF       | 12-1   | 30   | CVVNKYDKIIF        |                |           |                            |         |         | 1       |
| 7-9  | 2-7  | CASSLDIEQYF       | 12-1   | 31   | XVVNXXDRLMX        |                |           | 1                          |         |         |         |
| 12-3 | 2-2  | CALGEQNTGELFF     | 12-1   | 34   | CVVNKDDKLI         |                | 1         |                            |         |         |         |
| 2    | 2-2  | CASPNQNTGELFF     | 12-1   | 34   | CVVNGTNDKLI        |                | 1         |                            |         |         |         |
| 7-9  | 2-2  | CARGLANTGELFF     | 12-1   | 34   | CVVNGADKLI         |                | 1         |                            |         |         |         |
| 12-3 | 2-2  | CASINLNTGELFF     | 12-1   | 39   | CVVNSHAGNMLTF      |                |           |                            |         |         | 1       |
| 29-1 | 2-2  | CSVEADRNTGELFF    | 12-1   | 41   | CVVNKDSGYALNF      |                |           |                            |         |         | 1       |
| 11-2 | 2-2  | ND                | 12-1   | 43   | CVVNNNDMRF         |                |           | 1                          |         |         |         |
| 12-3 | 2-2  | CALGDLNTGELFF     | 12-1   | 43   | CVVNRNDMRF         |                |           |                            |         |         | 1       |
| 12-3 | 2-2  | CASGKQNTGELFF     | 12-1   | 43   | CVVNEKDDMRF        |                |           |                            |         |         | 1       |
| 12-3 | 2-2  | CAAGQGNTGELFF     | 12-1   | 43   | CVVNRADDMRF        |                |           |                            |         |         | 1       |
| 12-3 | 2-2  | CASINLNTGELFF     | 12-1   | 43   | CVVNNNDMRF         |                |           |                            |         |         | 1       |
| 12-3 | 2-2  | CARGDANTGELFF     | 12-1   | 43   | CVVNNNDMRF         |                |           |                            |         |         | 2       |
| 19   | 2-2  | CAGQVTNTGELFF     | 12-1   | 43   | CVVNRNDMRF         |                |           |                            | 1       |         |         |
| 2    | 2-2  | CASSDLNTGELFF     | 12-1   | 43   | CVVNGGNDMRF        |                | 1         |                            |         |         |         |
| 2    | 2-2  | CASSDLNTGELFF     | 12-1   | 43   | CVVNGNNDMRF        |                | 1         |                            |         |         |         |
| 2    | 2-2  | CASSEIDTGELFF     | 12-1   | 43   | CVVNRNDMRF         |                | 1         |                            |         |         |         |
| 2    | 2-2  | CASGQLNTGELFF     | 12-1   | 43   | CVVNRGNDMRF        |                |           |                            |         |         | 1       |
| 2    | 2-2  | CASNDLNTGELFF     | 12-1   | 43   | CVVNKGNMRF         |                |           |                            |         |         | 1       |
| 2    | 2-2  | CASQDTNTGELFF     | 12-1   | 43   | CVVNKGNMRF         |                |           |                            | 1       |         |         |
| 2    | 2-2  | CAVEGNLNTGELFF    | 12-1   | 43   | CVVNNNDMRF         |                |           |                            |         |         | 1       |
| 20-1 | 2-2  | CSARDRQGQNTGELFF  | 12-1   | 43   | CVVXSFDMMRF        |                |           |                            |         |         | 1       |
| 24-1 | 2-2  | CATQRANTGELFF     | 12-1   | 43   | GVVNMGDDMRF        |                | 1         |                            |         |         |         |
| 3-1  | 2-2  | CAVQGMNTGELFF     | 12-1   | 43   | CVVNNNDMRF         |                | 1         |                            |         |         |         |
| 5-1  | 2-2  | CASGEENT#GELFF    | 12-1   | 43   | CVVNKNDMRF         |                |           | 1                          |         |         |         |
| 5-4  | 2-2  | CASSPDRNTGELFF    | 12-1   | 43   | CVVNVMDMMRF        |                | 1         |                            |         |         |         |
| 5-8  | 2-2  | CAIIDRNTGELFF     | 12-1   | 43   | CVVNRDDMRF         |                |           |                            |         |         | 1       |
| 6-5  | 2-2  | CATTSLNTGELFF     | 12-1   | 43   | CVVNRDNDMRF        |                |           | 1                          |         |         |         |
| 7-8  | 2-2  | CASGQLNTGELFF     | 12-1   | 43   | CVVNNNDMRF         |                |           | 1                          |         |         |         |
| 7-8  | 2-2  | CASYFQDTGELFF     | 12-1   | 43   | XVVNGXXDMXF        |                | 1         |                            |         |         |         |
| 7-8  | 2-7  | CASSAGVSGEQYF     | 12-1   | 43   | CVVNVVDDMRF        |                |           | 2                          |         |         |         |
| 7-9  | 2-3  | CASSLDIEQYF       | 12-1   | 43   | CVVNSFDDMRF        |                |           |                            |         | 1       |         |
| 29-1 | 2-2  | CSARTSGGQNTGELFF  | 12-1   | 47   | XVXNREDKLVF        |                | 1         |                            |         |         |         |
| 7-9  | 1-1  | CASSPDIVAFF       | 12-2   | 30   | CAVNRDDKIIF        |                |           |                            |         |         | 1       |
| 7-9  | 1-1  | CASSDIEAFF        | 12-2   | 30   | CAVNGDDKIIF        |                | 1         | 1                          |         |         |         |
| 7-9  | 2-1  | CASSFDIAEFF       | 12-2   | 30   | CAVNQDDKIIF        |                | 1         |                            |         |         |         |
| 7-9  | 2-7  | CASSPDIEQYF       | 12-2   | 30   | CAVNRDDKIIF        | 1              |           |                            |         | 1       |         |
| 9    | 2-5  | XPXXGXXX          | 13-1   | 21   | CAVGNFNKYF         |                |           |                            |         | 1       |         |
| 20-1 | 2-2  | CSARDPLAINTGELFF  | 13-1   | 28   | CAAS#YSGAGSYQLTF   |                | 1         |                            |         |         |         |
| 20-1 | 2-2  | CSARDPLAINTGELFF  | 13-1   | 29   | ND                 |                | 1         |                            |         |         |         |
| 7-9  | 2-1  | CASSPDIDQFF       | 13-1   | 3    | CAATPE#SSASKIIF    |                |           |                            | 1       |         |         |
| 7-3  | 1-5  | CASSPDDGQPQHF     | 13-1   | 39   | XPXXRXXXQX##TF     |                |           |                            |         |         | 1       |
| 7-8  | 2-2  | CGELAQNTGELFF     | 13-1   | 47   | CAAFGXKXQ##VF      |                |           |                            | 1       |         |         |
| 2    | 1-1  | CASPRTGLSNTAEFF   | 13-1   | 48   | XXXXXXXXX##F       |                |           |                            |         |         | 1       |
| 9    | 2-2  | CASSEENTGELFF     | 13-2   | 3    | CAEPSASKIIF        |                | 1         |                            |         |         |         |
| 2    | 2-2  | CASQNRDTGELFF     | 13-2   | 35   | CAES#IGFGNVLHC     |                |           |                            |         |         | 2       |
| 20-1 | 2-2  | CSARGKREHNTGELFF  | 13-2   | 42   | CAENSHPRGGGSGGNLIF |                | 1         |                            |         |         |         |
| 7-9  | 2-2  | CAPGVNTGELFF      | 13-2   | 49   | CADT##NTGNQFYF     |                | 1         |                            |         |         |         |
| 25-1 | 2-2  | CALQDXTGEXFF      | 14/DV4 | 20   | CAMRE#SNDYKLSF     |                | 1         |                            |         |         |         |
| 24-1 | 2-1  | CATSGPLPR*#SYNEQF | 14/DV4 | 21   |                    |                | 1         |                            |         |         |         |
|      |      | F                 |        |      |                    |                |           |                            |         |         |         |
| 15   | 2-2  | CATTEGVAGELFF     | 14/DV4 | 27   | ND                 |                |           |                            |         |         | 1       |
| 27   | 2-7  | CASSDRGRSYEQYF    | 14/DV4 | 28   | CAMREAPFAYSGAGSYQ  |                |           |                            | 1       |         |         |
|      |      |                   |        |      | LTF                |                |           |                            |         |         |         |
| ND   | ND   | ND                | 14/DV4 | 41   | CAMREGSGYALNF      |                |           |                            |         |         | 1       |
| 15   | 2-2  | CATTEGVAGELFF     | 14/DV4 | 42   | CATR##GSQGNLIF     |                |           |                            |         |         | 3       |
| 9    | 2-7  | CASSVEPGWDEQYF    | 14/DV4 | 48   | CAMRGAGNEKLT       |                |           |                            |         | 1       |         |
| 19   | 2-7  | CASSIGDEQYF       | 14/DV4 | 5    | LLLCRDC#DTGRRALTF  |                |           |                            | 1       |         |         |
| 19   | 2-3  | CASSIDLADTQYF     | 16     | 15   | CAXPXACXXC##IF     |                |           |                            |         |         | 1       |
| 6-1  | 2-2  | CASQRMNTGELFF     | 16     | 37   | CALQ#GSSNTGKLI     |                |           |                            |         |         | 1       |
| 24-1 | 2-1  | CATSGPLPR*#SYNEQF | 16     | 42   | CALSD#YGGGSGGNLIF  |                | 1         |                            |         |         |         |
|      |      | F                 |        |      |                    |                |           |                            |         |         |         |
| 7-8  | 1-2  | CASSDSYGYTF       | 16     | 42   | CALSD#YGGGSGGNLIF  |                |           | 1                          |         |         |         |
| 2    | 2-2  | CASTRDLNTGELFF    | 16     | 43   | CALGGRVDNDMRF      |                |           | 1                          |         |         |         |
| ND   | ND   | ND                | 17     | 16   | CGGGGQKLLF         |                | 1         |                            |         |         |         |
| 20-1 | 2-2  | CSARDPWGINTGELFF  | 17     | 29   | VXXVSSGNTHLXF      |                |           | 1                          |         |         |         |
| 7-8  | 2-2  | CASSFQDTGELFF     | 17     | 52   | CVXXIXXWXXXKX##TF  |                |           |                            |         |         | 1       |
| 6-6  | 2-2  | CASENRNTGELFF     | 17     | 54   | CAPEIQGAQKLVF      |                |           | 1                          |         |         |         |
| 19   | 2-2  | CASQTLNTGELFF     | 19     | 47   | CALTPLRPKLVF       |                |           | 1                          |         |         |         |
| 13   | 2-2  | CASSPLQGGNTGELFF  | 21     | 28   | ND                 |                | 2         |                            |         |         |         |
| 7-8  | 2-2  | CASSLQNTGELFF     | 21     | 30   | ATYLCAAGDDKIIF     |                | 1         |                            |         |         |         |
| 5-1  | 2-2  | CASGDENTGELFF     | 23/DV6 | 34   |                    |                |           | 1                          |         |         |         |
| 7-9  | 2-2  | CAGGEPNTGELFF     | 23/DV6 | 34   | CAASRADKLI         |                | 1         |                            |         |         |         |
| 2    | 2-2  | CAINEQNTGELFF     | 23/DV6 | 35   | CAASXXXAXGMX#HC    |                |           |                            |         |         | 1       |
| 7-9  | 1-1  | CASSPDIEAFF       | 23/DV6 | 4    | XAASRNLWXXQ##IF    |                |           |                            |         |         | 1       |
| 15   | 2-2  | CATQEGNTGELFF     | 23/DV6 | 44   | CAV*GTASKXTF       |                |           |                            |         |         | 1       |
| 10-2 | 2-2  | CASLVQENTGELFF    | 23/DV6 | 45   | ND                 |                | 1         |                            |         |         |         |
| 20-1 | 2-2  | CSAPSYGELFF       | 23/DV6 | 49   | CAADYTGNTQFYF      |                |           |                            |         |         | 1       |
| 4-2  | 2-3  | CASSQVESADTQYF    | 23/DV6 | 49   | CAAXYXXQXYX        |                |           |                            | 1       |         |         |
| 27   | 1-5  | CASSYSSYGSNQPQHF  | 24     | 28   | XXXXWGXSQQLTX      |                |           |                            |         |         | 1       |
| 4-2  | 2-2  | CATQDANTGELFF     | 25     | 42   | CAGLGDGGSQGNLIF    |                | 1         |                            |         |         |         |





**Table S4.** TCR diversity scores of pre-pandemic and COVID-19 TCR $\alpha\beta$  repertoires. Related to Figure 7.

| Epitope               | Group             | #Donors | #TCR $\alpha\beta$ pairs | #TCR $\alpha\beta$ clones | TCRdiv- $\alpha$ | TCRdiv- $\beta$ | TCRdiv- $\alpha\beta$ |
|-----------------------|-------------------|---------|--------------------------|---------------------------|------------------|-----------------|-----------------------|
| A2/S <sub>269</sub> * | COVID-19          | 4       | 43                       | 35                        | 34.8             | 101.0           | 147.9                 |
| A2/S <sub>269</sub>   | COVID-19          | 5       | 75                       | 57                        | 29.8             | 76.9            | 100.1                 |
| B7/N <sub>105</sub>   | Pre-pandemic      | 4       | 43                       | 37                        | 935.7            | 322.9           | 730.4                 |
| B7/N <sub>105</sub> * | COVID-19          | 4       | 42                       | 25                        | 282.3            | 291             | 299.9                 |
| B7/N <sub>105</sub>   | COVID-19          | 4       | 82                       | 42                        | 809.8            | 831.9           | 860.6                 |
| A2/EBV*               | Dash et al., 2017 | 4       | 46                       | 17                        | 5                | 9.2             | 6.6                   |
| A2/EBV                | Dash et al., 2017 | 6       | 470                      | 76                        | 9.5              | 15.3            | 14.9                  |
| A2/M1*                | Dash et al., 2017 | 4       | 43                       | 19                        | 15.4             | 8               | 16.9                  |
| A2/M1                 | Dash et al., 2017 | 15      | 453                      | 275                       | 21.3             | 5.8             | 21.4                  |
| A2/CMV*               | Dash et al., 2017 | 4       | 48                       | 9                         | 36               | 35.4            | 36                    |
| A2/CMV                | Dash et al., 2017 | 10      | 307                      | 61                        | 61.3             | 134             | 421.5                 |

\*TCRs were randomly subsampled from the full dataset for ease of comparisons to the

smaller B7/N<sub>105</sub> pre-pandemic and A2/S<sub>269</sub> COVID-19 TCR datasets.
